# Supplementary material for: Pharmacokinetics of Carboplatin in Combination with Low-Dose Cyclophosphamide in Female Dogs with Mammary Carcinoma
Source: MDPI journal article supplement (doi:10.3390/ani12223109), 2022-11-10
Supplement: s1 [file s1]

**Table S2.** Shapiro-Wilk tests for raw and log-transformed values.

| Variable                          | Raw values |                 | Log-transformed values |                 |
|-----------------------------------|------------|-----------------|------------------------|-----------------|
|                                   | W          | <i>p</i> -value | W                      | <i>p</i> -value |
| AUC <sup>0-t</sup> (µg/mL·min)    | 0.88       | 0.0051 (**)     | 0.97                   | 0.57            |
| AUC <sup>0-∞</sup><br>(µg/mL·min) | 0.89       | 0.0060 (**)     | 0.97                   | 0.50            |
| C <sub>max</sub> (µg/mL)          | 0.89       | 0.0062 (**)     | 0.97                   | 0.52            |
| CL (L/h/m <sup>2</sup> )          | 0.83       | 0.00046 (***)   | 0.97                   | 0.50            |

$p < 0.05$  means the distribution of the sample differs from a normal distribution. (\*\*)  $p < 0.01$ ,

(\*\*)  $p < 0.001$ .
