# Supplementary material for: Pharmacokinetics of Carboplatin in Combination with Low-Dose Cyclophosphamide in Female Dogs with Mammary Carcinoma
Source: MDPI journal article supplement (doi:10.3390/ani12223109), 2022-11-10
Supplement: s1 [file s1]

**Table S1.** Validation of the LC-UV method for analysis of carboplatin in canine plasma.

| Validation parameters                 |                        |                         |
|---------------------------------------|------------------------|-------------------------|
| Linearity                             | 1-75 µg/mL             |                         |
| R                                     | 0.99713                |                         |
| Slope                                 | 6144.74                |                         |
| y-intercept                           | -6138.35               |                         |
| Weight                                | 1/x²                   |                         |
| Precision                             | Within-run (CV %, n=5) | Between-run (CV %, n=3) |
| LLOQ (1 µg/mL)                        | 7.67                   | 9.21                    |
| LQC (3 µg/mL)                         | 10.68                  | 13.84                   |
| MQC (40 µg/mL)                        | 10.75                  | 11.64                   |
| HQC (60 µg/mL)                        | 7.94                   | 11.49                   |
| Accuracy                              | Within-run (RE %, n=5) | Between-run (RE %, n=3) |
| LLOQ (1 µg/mL)                        | 13.15                  | 18.57                   |
| LQC (3 µg/mL)                         | -5.98                  | -3.67                   |
| MQC (40 µg/mL)                        | 0.50                   | 0.32                    |
| HQC (60 µg/mL)                        | -4.89                  | 0.42                    |
| Stability (RE %, n=3)                 |                        |                         |
| Short-term (4 h at 24 °C)             |                        |                         |
| LQC (3 µg/mL)                         | 12.95                  |                         |
| HQC (60 µg/mL)                        | 11.46                  |                         |
| Long-term (70 days at -70 °C)         |                        |                         |
| LQC (3 µg/mL)                         | 1.63                   |                         |
| HQC (60 µg/mL)                        | 13.58                  |                         |
| Post-preparative (42 h at 18 °C)      |                        |                         |
| LQC (3 µg/mL)                         | -10.75                 |                         |
| HQC (60 µg/mL)                        | -14.48                 |                         |
| Freeze/thaw cycles (n=3, -70 °C)      |                        |                         |
| LQC (3 µg/mL)                         | -8.28                  |                         |
| HQC (60 µg/mL)                        | 13.11                  |                         |
| Standard solution (30 days at 4-8 °C) |                        |                         |
| 12.5 µg/mL                            | -5.98                  |                         |
| 1000 µg/mL                            | -8.26                  |                         |

r: linear correlation coefficient; CV: coefficient of variation [(standard deviation/mean concentration) × 100]; RE: relative error {[(observed mean concentration – nominal concentration)/nominal concentration] × 100}; LLOQ: lower limit of quantification; LQC: low quality control; MQC: medium quality control; HQC: high quality control.
