# Supplementary material for: Pharmacokinetics of Carboplatin in Combination with Low-Dose Cyclophosphamide in Female Dogs with Mammary Carcinoma
Source: MDPI journal article supplement (doi:10.3390/ani12223109), 2022-11-10
Supplement: s1 [file s1]

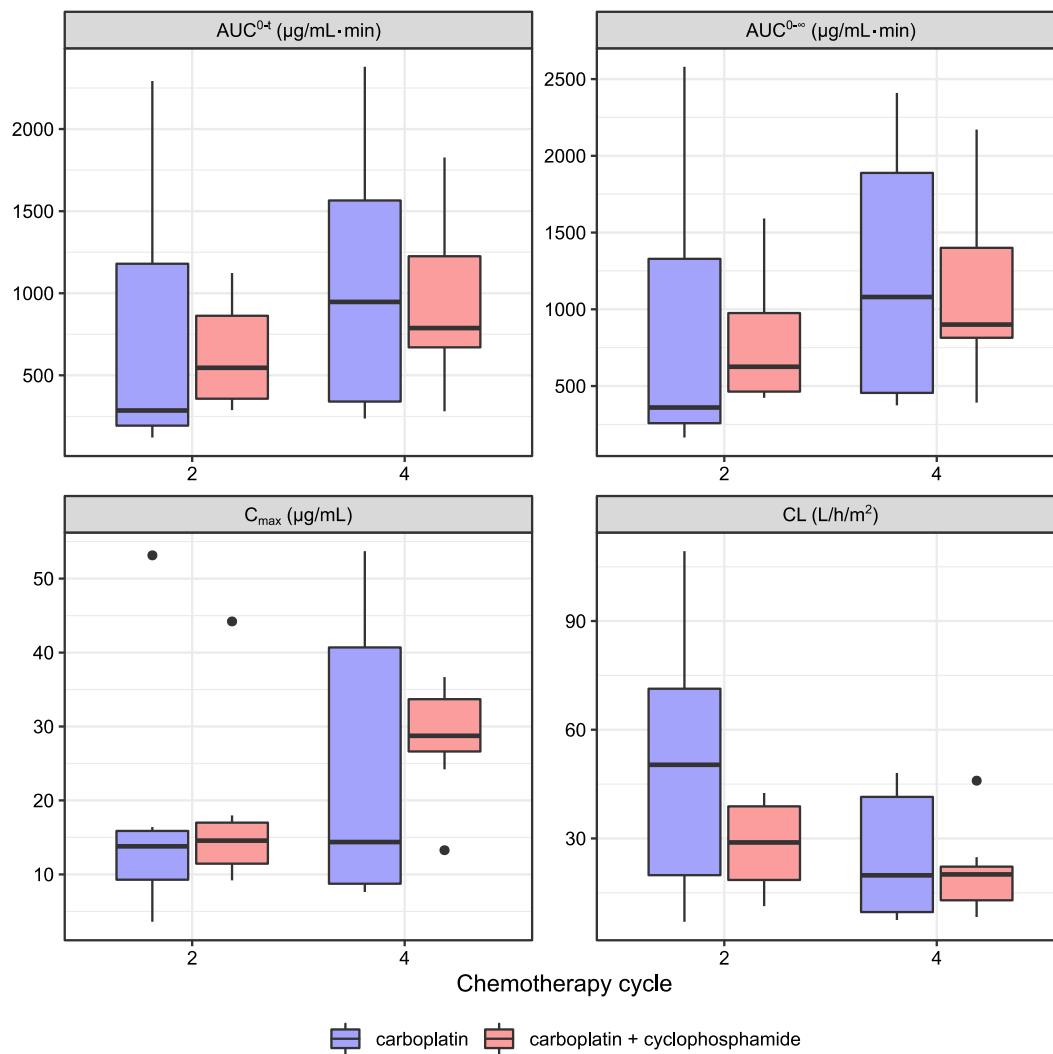

**Figure S1.** Boxplots of the PK parameters of carboplatin in the presence and absence of cyclophosphamide.
