# Supplementary material for: Pharmacokinetics of Carboplatin in Combination with Low-Dose Cyclophosphamide in Female Dogs with Mammary Carcinoma
Source: MDPI journal article supplement (doi:10.3390/ani12223109), 2022-11-10
Supplement: s1 [file s1]

**Table S3.** PK parameters of carboplatin in the 2<sup>nd</sup> and 4<sup>th</sup> chemotherapy cycles.

| Parameter                         | Carboplatin                     |                                 |                     |                 | Carboplatin + Cyclophosphamide |                                |                     |                 |
|-----------------------------------|---------------------------------|---------------------------------|---------------------|-----------------|--------------------------------|--------------------------------|---------------------|-----------------|
|                                   | 2 <sup>nd</sup> Cycle           | 4 <sup>th</sup> Cycle           | GMR <sup>a</sup>    | <i>p</i> -Value | 2 <sup>nd</sup> Cycle          | 4 <sup>th</sup> Cycle          | GMR <sup>a</sup>    | <i>p</i> -Value |
| AUC <sub>0-t</sub><br>(µg/mL·min) | 423.4 (176.7)<br>[159.1–1127.0] | 754.0 (125.3)<br>[339.1–1676.7] | 1.78<br>[0.57–5.58] | 0.38            | 557.2 (53.5)<br>[398.2–779.7]  | 831.1 (61.9)<br>[567.4–1217.3] | 1.49<br>[0.93–2.39] | 0.16            |
| AUC <sub>0-∞</sub><br>(µg/mL·min) | 525.1 (155.3)<br>[211.1–1306.5] | 941.7 (99.6)<br>[475.7–1864.2]  | 1.79<br>[0.64–5.04] | 0.33            | 698.4 (50.6)<br>[507.2–961.5]  | 984.2 (56.2)<br>[693.0–1397.7] | 1.41<br>[0.91–2.19] | 0.19            |
| C <sub>max</sub><br>(µg/mL)       | 12.9 (109.6)<br>[6.2–26.9]      | 17.7 (108.3)<br>[8.6–36.4]      | 1.36<br>[0.54–3.44] | 0.56            | 15.2 (53.3)<br>[10.9–21.3]     | 27.3 (33.0)<br>[22.0–33.8]     | 1.79<br>[1.23–2.60] | 0.02 *          |

Data are presented as geometric means (geometric percentage of coefficient of variation) and [90% confidence interval]. GMR<sup>a</sup>: geometric mean ratio [90% confidence interval]. AUC<sub>0-t</sub>: area under the plasma concentration-time curve calculated from the time of dosing up to the last observation time. AUC<sub>0-∞</sub>: area under the plasma concentration-time curve from the time of dosing extrapolated to infinity. C<sub>max</sub>: maximum plasma concentration. (\*) *p* < 0.05.
